# Supplementary material for: Restart of Anticoagulant Therapy and Risk of Thrombosis, Rebleeding, and Death after Factor Xa Inhibitor Reversal in Major Bleeding Patients
Source: PubMed Central journal article supplement — Thromb Haemost. 2021 Feb 25;121(8):1097–106. doi: 10.1055/a-1400-6159 (PMC8322590; doi:10.1055/a-1400-6159), 2021-02-25
Supplement: 10-1055-a-1400-6159-s210029.pdf [file 10-1055-a-1400-6159-s210029.pdf]

**Supplementary Table S1** Events within 30 days and restart of anticoagulation

|                                                                                        | Safety population (N = 352) |
|----------------------------------------------------------------------------------------|-----------------------------|
| <b>Thrombotic event within 30 days</b>                                                 |                             |
| Patients with thromboembolic event, <sup>a</sup> No. (%)                               | 34 (9.7)                    |
| Deep vein thrombosis                                                                   | 13 (3.7)                    |
| Ischemic stroke                                                                        | 13 (3.7)                    |
| Myocardial infarction                                                                  | 7 (2.0)                     |
| Pulmonary embolism                                                                     | 5 (1.4)                     |
| Stroke, uncertain of classification                                                    | 1 (0.3)                     |
| TIA                                                                                    | 1 (0.3)                     |
| Days to first thromboembolic event, median (IQR)                                       | 10.0 (2.0–18.0)             |
| <b>Restart of full oral anticoagulation</b>                                            |                             |
| Patients with full oral anticoagulation, No. (%)                                       | 100 (28.4)                  |
| Days to full oral anticoagulation, median (IQR)                                        | 10.0 (5.0–16.0)             |
| Patients with first thromboembolic event before restart, <sup>b</sup> No. (%)          | 8 (2.3)                     |
| Patients with first thromboembolic event after restart, No. (%)                        | 0 (0.0)                     |
| <b>Hemorrhagic events within 30 days</b>                                               |                             |
| Patients with hemorrhagic events, No. (%)                                              | 29 (8.2)                    |
| Days to first hemorrhagic events, median (IQR)                                         | 3.0 (1.0–8.0)               |
| Patients with hemorrhagic events after day 3, No. (%)                                  | 15 (4.3)                    |
| Days to first hemorrhagic events after day 3, median (IQR)                             | 9.0 (5.0–17.0)              |
| <b>Composite of thromboembolic event and hemorrhagic event</b>                         |                             |
| Patients with composite of thromboembolic and hemorrhagic events, <sup>c</sup> No. (%) | 48 (13.6)                   |
| <b>Death within 30 days</b>                                                            |                             |
| Mortality, No. (%)                                                                     | 49 (13.9)                   |
| Days to death, median (IQR)                                                            | 12.0 (8.0–18.0)             |

Abbreviations: IQR, interquartile range; TIA, transient ischemic attack.

<sup>a</sup>Some patients had >1 thrombotic event.

<sup>b</sup>Thrombotic events that occurred on the day of restarting anticoagulation were considered to have occurred before the restart.

<sup>c</sup>Hemorrhagic events within the first 3 days were excluded.

**Supplementary Table S2** Frequency of Oral Anticoagulant Drug

| Oral anticoagulant                    | No. (%)<br>(n = 100) |
|---------------------------------------|----------------------|
| Apixaban 10.0 mg                      | 1 (1.0)              |
| Apixaban 2.5 mg                       | 19 (19.0)            |
| Apixaban 5.0 mg                       | 28 (28.0)            |
| Dabigatran 110.0 mg                   | 2 (2.0)              |
| Dabigatran 150.0 mg                   | 2 (2.0)              |
| Edoxaban 30.0 mg                      | 2 (2.0)              |
| Phenprocoumon 3.0 mg                  | 1 (1.0)              |
| Rivaroxaban 10.0 mg                   | 1 (1.0)              |
| Rivaroxaban 15.0 mg                   | 7 (7.0)              |
| Rivaroxaban 20.0 mg                   | 21 (21.0)            |
| Warfarin with a dose range 2.0–7.5 mg | 16 (16.0)            |

Note: Percentages are based on total number of patients who have taken an oral anticoagulant within 30 days as the denominator. For patients with multiple oral anticoagulant records, only the first oral anticoagulant is considered.

**Supplementary Table S3** List of oral anticoagulant drugs taken within 30 days

| Patient ID | Bolus date | Oral anticoagulant generic name | Dose, mg | Total no. of doses | Frequency of dose | Non-restart of therapeutic-dose due to renal and/or liver dysfunction | Date of first oral anticoagulant | Day of first oral anticoagulant (from bolus date) |
|------------|------------|---------------------------------|----------|--------------------|-------------------|-----------------------------------------------------------------------|----------------------------------|---------------------------------------------------|
| 8004       | 16-11-29   | Apixaban                        | 2.5      | -                  |                   | -                                                                     | 16-11-30                         | 2                                                 |
| 11004      | 16-10-22   | Apixaban                        | 5        | 35                 |                   | -                                                                     | 16-10-23                         | 2                                                 |
| 400003     | 16-02-15   | Apixaban                        | 2.5      | -                  |                   | -                                                                     | 16-02-16                         | 2                                                 |
| 3004       | 16-02-11   | Rivaroxaban                     | 20       | 2                  |                   | -                                                                     | 16-02-12                         | 2                                                 |
| 100002     | 16-05-08   | Rivaroxaban                     | 20       | 32                 |                   | -                                                                     | 16-05-09                         | 2                                                 |
| 24025      | 18-05-21   | Apixaban                        | 5        | -                  | BID               | No                                                                    | 18-05-23                         | 3                                                 |
| 35004      | 16-05-16   | Apixaban                        | 2.5      | 1                  |                   | -                                                                     | 16-05-18                         | 3                                                 |
| 229001     | 18-02-25   | Apixaban                        | 5        | -                  | BID               | No                                                                    | 18-02-27                         | 3                                                 |
| 400006     | 16-04-22   | Apixaban                        | 2.5      | 3                  |                   | -                                                                     | 16-04-24                         | 3                                                 |
| 4004       | 16-02-17   | Rivaroxaban                     | 20       | 32                 |                   | -                                                                     | 16-02-19                         | 3                                                 |
| 46009      | 18-04-09   | Rivaroxaban                     | 15       | -                  | QD                | No                                                                    | 18-04-11                         | 3                                                 |
| 301002     | 16-07-22   | Rivaroxaban                     | 20       | 1                  |                   | -                                                                     | 16-07-24                         | 3                                                 |
| 14013      | 18-04-04   | Apixaban                        | 5        | -                  | BID               | No                                                                    | 18-04-07                         | 4                                                 |
| 210004     | 18-02-19   | Apixaban                        | 2.5      | -                  | BID               | No                                                                    | 18-02-22                         | 4                                                 |
| 7001       | 15-09-26   | Rivaroxaban                     | 20       | 29                 |                   | -                                                                     | 15-09-29                         | 4                                                 |
| 46008      | 18-03-05   | Rivaroxaban                     | 20       | -                  | QD                | No                                                                    | 18-03-08                         | 4                                                 |
| 51002      | 16-05-08   | Rivaroxaban                     | 20       | -                  |                   | -                                                                     | 16-05-11                         | 4                                                 |
| 210002     | 17-12-15   | Rivaroxaban                     | 20       | -                  | PM                | No                                                                    | 17-12-18                         | 4                                                 |
| 3008       | 16-05-13   | Apixaban                        | 5        | 57                 |                   | -                                                                     | 16-05-17                         | 5                                                 |
| 3026       | 18-05-01   | Apixaban                        | 5        | -                  | BID               | No                                                                    | 18-05-05                         | 5                                                 |
| 242003     | 18-04-27   | Apixaban                        | 5        | -                  | QD                | No                                                                    | 18-05-01                         | 5                                                 |
| 301010     | 17-12-02   | Apixaban                        | 2.5      | 62                 |                   | -                                                                     | 17-12-06                         | 5                                                 |
| 400019     | 18-01-09   | Apixaban                        | 5        | -                  | QD                | No                                                                    | 18-01-13                         | 5                                                 |
| 29007      | 16-12-12   | Edoxaban                        | 30       | 11                 |                   | -                                                                     | 16-12-16                         | 5                                                 |
| 16003      | 15-12-26   | Rivaroxaban                     | 20       | 23                 |                   | -                                                                     | 15-12-30                         | 5                                                 |
| 100003     | 17-03-14   | Rivaroxaban                     | 15       | 1                  |                   | -                                                                     | 17-03-18                         | 5                                                 |
| 154006     | 17-09-04   | Rivaroxaban                     | 20       | -                  | QD                | No                                                                    | 17-09-08                         | 5                                                 |
| 210001     | 17-10-17   | Rivaroxaban                     | 15       | -                  | QD                | No                                                                    | 17-10-21                         | 5                                                 |
| 26004      | 16-08-29   | Warfarin                        | 5        | 3                  |                   | -                                                                     | 16-09-02                         | 5                                                 |
| 41006      | 16-04-16   | Warfarin                        | 5        | 3                  |                   | -                                                                     | 16-04-20                         | 5                                                 |
| 210003     | 18-01-04   | Apixaban                        | 5        | -                  | BID               | No                                                                    | 18-01-09                         | 6                                                 |
| 400007     | 16-05-29   | Apixaban                        | 5        | 14                 |                   | -                                                                     | 16-06-03                         | 6                                                 |
| 24010      | 16-05-11   | Rivaroxaban                     | 20       | 29                 |                   | -                                                                     | 16-05-16                         | 6                                                 |
| 154005     | 17-06-16   | Rivaroxaban                     | 20       | 17                 |                   | -                                                                     | 17-06-21                         | 6                                                 |
| 301008     | 17-09-02   | Rivaroxaban                     | 20       | 26                 |                   | -                                                                     | 17-09-07                         | 6                                                 |
| 14014      | 18-04-18   | Apixaban                        | 5        | -                  | BID               | No                                                                    | 18-04-24                         | 7                                                 |
| 153007     | 18-03-21   | Apixaban                        | 5        | -                  | BID               | No                                                                    | 18-03-27                         | 7                                                 |
| 153008     | 18-04-10   | Edoxaban                        | 30       | -                  | QD                | No                                                                    | 18-04-16                         | 7                                                 |
| 12003      | 16-05-11   | Apixaban                        | 2.5      | 2                  |                   | -                                                                     | 16-05-18                         | 8                                                 |
| 13008      | 16-03-09   | Apixaban                        | 2.5      | 11                 |                   | -                                                                     | 16-03-16                         | 8                                                 |
| 38003      | 16-02-23   | Rivaroxaban                     | 20       | 28                 |                   | -                                                                     | 16-03-01                         | 8                                                 |
| 242002     | 18-03-19   | Rivaroxaban                     | 20       | -                  | QD                | No                                                                    | 18-03-26                         | 8                                                 |
| 301005     | 17-07-26   | Rivaroxaban                     | 15       | 6                  |                   | -                                                                     | 17-08-02                         | 8                                                 |
| 13013      | 17-02-20   | Apixaban                        | 5        | 48                 |                   | -                                                                     | 17-02-28                         | 9                                                 |

Supplementary Table S3 (Continued)

| Patient ID | Bolus date | Oral anticoagulant generic name | Dose, mg | Total no. of doses | Frequency of dose | Non-restart of therapeutic-dose due to renal and/or liver dysfunction | Date of first oral anticoagulant | Day of first oral anticoagulant (from bolus date) |
|------------|------------|---------------------------------|----------|--------------------|-------------------|-----------------------------------------------------------------------|----------------------------------|---------------------------------------------------|
| 301001     | 16-07-17   | Apixaban                        | 2.5      | 60                 |                   | -                                                                     | 16-07-25                         | 9                                                 |
| 206002     | 17-07-13   | Dabigatran                      | 110      | -                  | BID               | No                                                                    | 17-07-21                         | 9                                                 |
| 14005      | 16-06-16   | Warfarin                        | 5        | -                  |                   | -                                                                     | 16-06-24                         | 9                                                 |
| 4003       | 16-02-15   | Apixaban                        | 5        | 10                 |                   | -                                                                     | 16-02-24                         | 10                                                |
| 13012      | 17-01-30   | Apixaban                        | 5        | 29                 |                   | -                                                                     | 17-02-08                         | 10                                                |
| 14011      | 17-12-21   | Apixaban                        | 5        | -                  | BID               | No                                                                    | 17-12-30                         | 10                                                |
| 400001     | 16-01-31   | Apixaban                        | 2.5      | 42                 |                   | -                                                                     | 16-02-09                         | 10                                                |
| 210006     | 18-04-08   | Phenprocoumon                   | 3        | -                  | QD                | No                                                                    | 18-04-17                         | 10                                                |
| 41009      | 16-08-02   | Warfarin                        | 5        | 4                  |                   | -                                                                     | 16-08-11                         | 10                                                |
| 46003      | 16-02-16   | Apixaban                        | 2.5      | 22                 |                   | -                                                                     | 16-02-26                         | 11                                                |
| 49006      | 18-04-18   | Apixaban                        | 5        | -                  | BID               | No                                                                    | 18-04-28                         | 11                                                |
| 400008     | 16-06-23   | Apixaban                        | 5        | 46                 |                   | -                                                                     | 16-07-03                         | 11                                                |
| 41008      | 16-07-08   | Rivaroxaban                     | 20       | 20                 |                   | -                                                                     | 16-07-18                         | 11                                                |
| 221007     | 18-02-20   | Rivaroxaban                     | 15       | -                  | QD                | No                                                                    | 18-03-02                         | 11                                                |
| 11003      | 16-02-07   | Warfarin                        | 2.5      | 1                  |                   | -                                                                     | 16-02-17                         | 11                                                |
| 26003      | 16-06-16   | Apixaban                        | 5        | 47                 |                   | -                                                                     | 16-06-27                         | 12                                                |
| 14009      | 17-09-07   | Rivaroxaban                     | 10       | -                  | QD                | No                                                                    | 17-09-18                         | 12                                                |
| 154001     | 16-06-22   | Apixaban                        | 5        | 11                 |                   | -                                                                     | 16-07-04                         | 13                                                |
| 221005     | 18-02-04   | Dabigatran                      | 110      | -                  | BID               | No                                                                    | 18-02-16                         | 13                                                |
| 153005     | 17-11-23   | Apixaban                        | 2.5      | -                  | BID               | No                                                                    | 17-12-06                         | 14                                                |
| 400018     | 17-12-27   | Apixaban                        | 2.5      | -                  | BID               | No                                                                    | 18-01-09                         | 14                                                |
| 301003     | 17-02-22   | Dabigatran                      | 150      | 2                  |                   | -                                                                     | 17-03-07                         | 14                                                |
| 46005      | 16-11-17   | Rivaroxaban                     | 15       | 24                 |                   | -                                                                     | 16-11-30                         | 14                                                |
| 29004      | 15-11-18   | Warfarin                        | 5        | 23                 |                   | -                                                                     | 15-12-01                         | 14                                                |
| 51004      | 16-12-05   | Apixaban                        | 5        | 36                 |                   | -                                                                     | 16-12-19                         | 15                                                |
| 1001       | 15-06-10   | Warfarin                        | 3        | 34                 |                   | -                                                                     | 15-06-24                         | 15                                                |
| 33005      | 16-08-24   | Warfarin                        | 2.5      | -                  |                   | -                                                                     | 16-09-07                         | 15                                                |
| 11012      | 18-02-26   | Apixaban                        | 2.5      | -                  | BID               | No                                                                    | 18-03-13                         | 16                                                |
| 13004      | 15-12-28   | Apixaban                        | 2.5      | 30                 |                   | -                                                                     | 16-01-12                         | 16                                                |
| 207007     | 18-02-12   | Apixaban                        | 5        | -                  | BID               | No                                                                    | 18-02-27                         | 16                                                |
| 29001      | 15-11-02   | Warfarin                        | 5        | 8                  |                   | -                                                                     | 15-11-17                         | 16                                                |
| 49004      | 16-10-19   | Warfarin                        | 5        | 20                 |                   | -                                                                     | 16-11-03                         | 16                                                |
| 3002       | 15-12-15   | Apixaban                        | 2.5      | 27                 |                   | -                                                                     | 15-12-31                         | 17                                                |
| 13018      | 17-12-18   | Apixaban                        | 5        | -                  | BID               | No                                                                    | 18-01-04                         | 18                                                |
| 33006      | 17-05-05   | Apixaban                        | 5        | -                  | BID               | No                                                                    | 17-05-22                         | 18                                                |
| 18001      | 15-08-15   | Warfarin                        | 5        | 9                  |                   | -                                                                     | 15-09-01                         | 18                                                |
| 24013      | 16-06-18   | Apixaban                        | 5        | 1                  |                   | -                                                                     | 16-07-06                         | 19                                                |
| 51003      | 16-07-08   | Rivaroxaban                     | 20       | 16                 |                   | -                                                                     | 16-07-27                         | 20                                                |
| 301004     | 17-04-21   | Rivaroxaban                     | 20       | 1                  |                   | -                                                                     | 17-05-10                         | 20                                                |
| 38004      | 16-06-08   | Warfarin                        | 4        | 17                 |                   | -                                                                     | 16-06-27                         | 20                                                |
| 241002     | 18-05-10   | Dabigatran                      | 150      | -                  | BID               | No                                                                    | 18-05-30                         | 21                                                |
| 24001      | 15-07-07   | Rivaroxaban                     | 20       | 29                 |                   | -                                                                     | 15-07-27                         | 21                                                |
| 152003     | 18-04-20   | Rivaroxaban                     | 20       | -                  | QD                | No                                                                    | 18-05-10                         | 21                                                |
| 46010      | 18-06-01   | Warfarin                        | 2.5      | -                  | QD                | No                                                                    | 18-06-21                         | 21                                                |

(Continued)

**Supplementary Table S3** (Continued)

| Patient ID | Bolus date | Oral anticoagulant generic name | Dose, mg | Total no. of doses | Frequency of dose | Non-restart of therapeutic-dose due to renal and/or liver dysfunction | Date of first oral anticoagulant | Day of first oral anticoagulant (from bolus date) |
|------------|------------|---------------------------------|----------|--------------------|-------------------|-----------------------------------------------------------------------|----------------------------------|---------------------------------------------------|
| 3023       | 18-03-02   | Apixaban                        | 5        | –                  | BID               | No                                                                    | 18-03-23                         | 22                                                |
| 13017      | 17-12-17   | Apixaban                        | 5        | –                  | BID               | No                                                                    | 18-01-07                         | 22                                                |
| 101003     | 16-07-03   | Apixaban                        | 2.5      | 21                 |                   | –                                                                     | 16-07-24                         | 22                                                |
| 24011      | 16-05-11   | Apixaban                        | 5        | 14                 |                   | –                                                                     | 16-06-02                         | 23                                                |
| 24014      | 16-09-21   | Apixaban                        | 5        | 27                 |                   | –                                                                     | 16-10-14                         | 24                                                |
| 352002     | 17-12-17   | Apixaban                        | 2.5      | –                  | BID               | No                                                                    | 18-01-09                         | 24                                                |
| 259001     | 17-08-30   | Rivaroxaban                     | 15       | –                  | QD                | No                                                                    | 17-09-23                         | 25                                                |
| 13002      | 15-07-20   | Warfarin                        | 2        | 20                 |                   | –                                                                     | 15-08-13                         | 25                                                |
| 29006      | 16-04-15   | Warfarin                        | 5        | 10                 |                   | –                                                                     | 16-05-09                         | 25                                                |
| 14012      | 18-02-18   | Apixaban                        | 2.5      | –                  | BID               | No                                                                    | 18-03-19                         | 30                                                |
| 152001     | 16-05-17   | Rivaroxaban                     | 20       | 1                  |                   | –                                                                     | 16-06-15                         | 30                                                |
| 18006      | 16-04-20   | Warfarin                        | 5        | 8                  |                   | –                                                                     | 16-05-19                         | 30                                                |

Abbreviations: BID, twice a day; PM, post meridiem; QD, once a day.

Note: For patients with multiple oral anticoagulant records, only the first oral anticoagulant is considered.

**Supplementary Table S4** Outcome up to day 30 for restarted and non-restarted overall<sup>a</sup>—safety population

| Outcome                                              | Not restarted on full OAC | Restarted on full OAC | HR (CI) <sup>b</sup> | p-Value |
|------------------------------------------------------|---------------------------|-----------------------|----------------------|---------|
| Number of subjects                                   | 252                       | 100                   |                      |         |
| Hemorrhage, <i>n</i> (%)                             | 11 (4.4%)                 | 4 (4.0%)              | 0.84 (0.27–2.65)     | 0.770   |
| TE, <i>n</i> (%)                                     | 26 (10.3%)                | 8 (8.0%)              | 0.72 (0.33–1.60)     | 0.427   |
| Death, <i>n</i> (%)                                  | 46 (18.3%)                | 3 (3.0%)              | 0.15 (0.05–0.48)     | <0.001  |
| Composite of hemorrhage, death, and TE, <i>n</i> (%) | 84 (24.7%)                | 2 (16.7%)             | 0.61 (0.15–2.50)     | 0.492   |

Abbreviations: CI, confidence interval; HR, hazard ratio; OAC, oral anticoagulant; TE, thromboembolic event.

Note: *p*-Values are calculated using a log-rank test.

<sup>a</sup>The restart group refers to the group of subjects who have restarted AC during the follow-up period from day 1 to day 30.

<sup>b</sup>HR(CI) values are calculated using a Cox proportional hazards regression model, with restart group as the predictor variable. Program name: outcome.sas; Produced: 09JUL20.

**Supplementary Table S5** Univariate comparison of anticoagulation restart versus non-restart using day 14 as the landmark

| Outcome                                                     | OAC non-restart, No. (%)<br>(N = 234) | OAC restart, No. (%)<br>(N = 67) | HR (CI) <sup>a</sup> | p-Value <sup>b</sup> |
|-------------------------------------------------------------|---------------------------------------|----------------------------------|----------------------|----------------------|
| Hemorrhage                                                  | 2 (0.9)                               | 3 (4.5)                          | 5.38<br>(1.08–26.90) | 0.039                |
| Thromboembolic event                                        | 12 (5.1)                              | 0 (0.0)                          | 0.27 (0.07–1.05)     | 0.060                |
| Death                                                       | 17 (7.3)                              | 3 (4.5)                          | 0.61 (0.19–1.95)     | 0.429                |
| Composite of hemorrhage, death,<br>and thromboembolic event | 29 (12.4)                             | 6 (9.0)                          | 0.73 (0.31–1.70)     | 0.474                |

Abbreviations: CI, confidence interval; HR, hazard ratio; OAC, oral anticoagulant.

<sup>a</sup>HR was calculated using a Cox proportional hazards regression model, with restart group as the predictor variable. The CI was constructed by inverting the partial-likelihood score test under the Cox model. For the test of thromboembolic event, in which a quasi-complete separation feature presented, Peto's estimation of the HR (CI) based on the log-rank test was used.

<sup>b</sup>p-values were calculated using a log-rank test.
